# Supplementary material for: A Glimpse into the Structural Properties of the Intermediate and Transition State in the Folding of Bromodomain 2 Domain 2 by Φ Value Analysis
Source: MDPI journal article supplement (doi:10.3390/ijms22115953), 2021-05-31
Supplement: s1 [file s1]

# A glimpse into the structural properties of the intermediate and transition state in the folding of Bromodomain 2 domain 2 by $\Phi$ -value analysis.

Leonore Novak <sup>1†</sup>, Maria Petrosino <sup>1†</sup>, Daniele Santorelli <sup>1†</sup>, Roberta Chiaraluce<sup>1</sup>, Valerio Consalvi <sup>1</sup>, Alessandra Pasquo <sup>2</sup> and Carlo Travaglini-Allocatelli<sup>1,\*</sup>

<sup>1</sup> Dipartimento di Scienze Biochimiche "A. Rossi Fanelli", Sapienza University of Rome, Roma (Italy); [leonore.novak@uniroma1.it](mailto:leonore.novak@uniroma1.it) (L.N.), [maria.petrosino@uniroma1.it](mailto:maria.petrosino@uniroma1.it) (M.P.), [daniele.santorelli@uniroma1.it](mailto:daniele.santorelli@uniroma1.it) (D.S.), [roberta.chiaraluce@uniroma1.it](mailto:roberta.chiaraluce@uniroma1.it) (R.C.), [valerio.consalvi@uniroma1.it](mailto:valerio.consalvi@uniroma1.it) (V.C.), [carlo.travaglini@uniroma1.it](mailto:carlo.travaglini@uniroma1.it) (C.T.)

<sup>2</sup> ENEA CR Frascati, Diagnostics and Metrology Laboratory FSN-TECFIS-DIM Frascati RM (Italy); [alessandra.pasquo@enea.it](mailto:alessandra.pasquo@enea.it)

<sup>†</sup> These authors contributed equally to this work

\* Correspondence: [carlo.travaglini@uniroma1.it](mailto:carlo.travaglini@uniroma1.it)

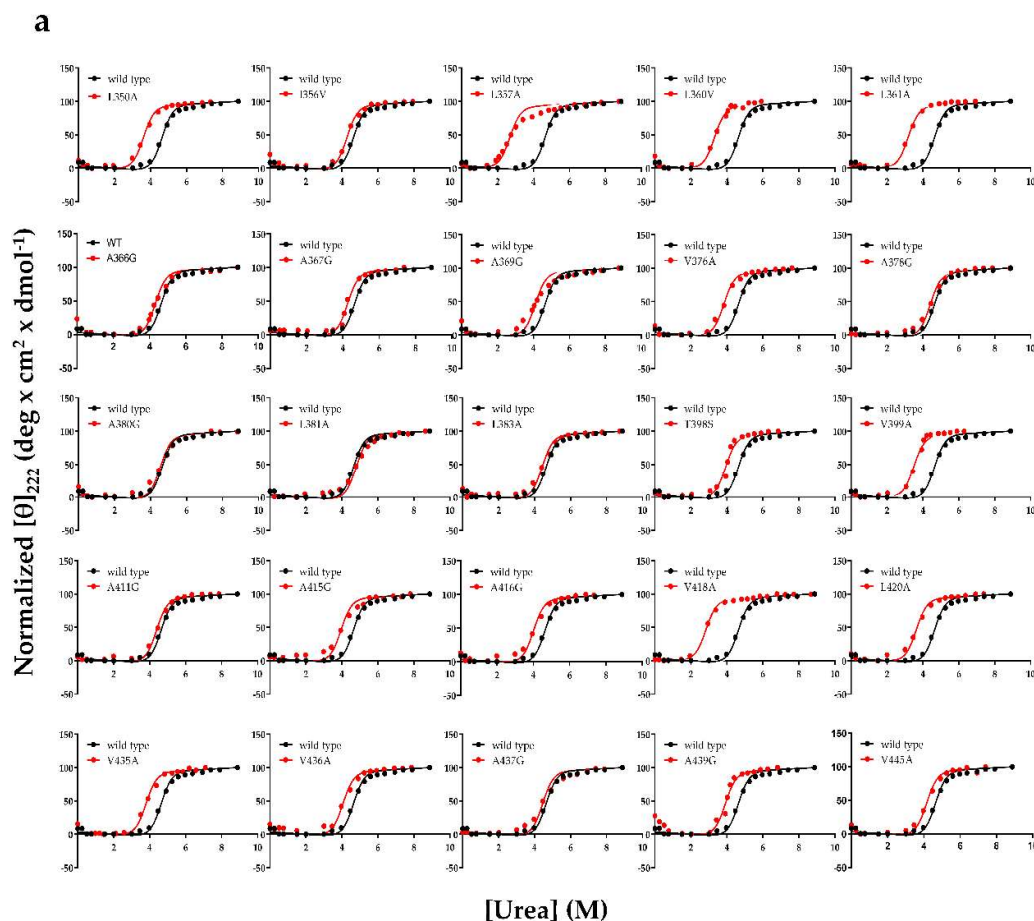

**b**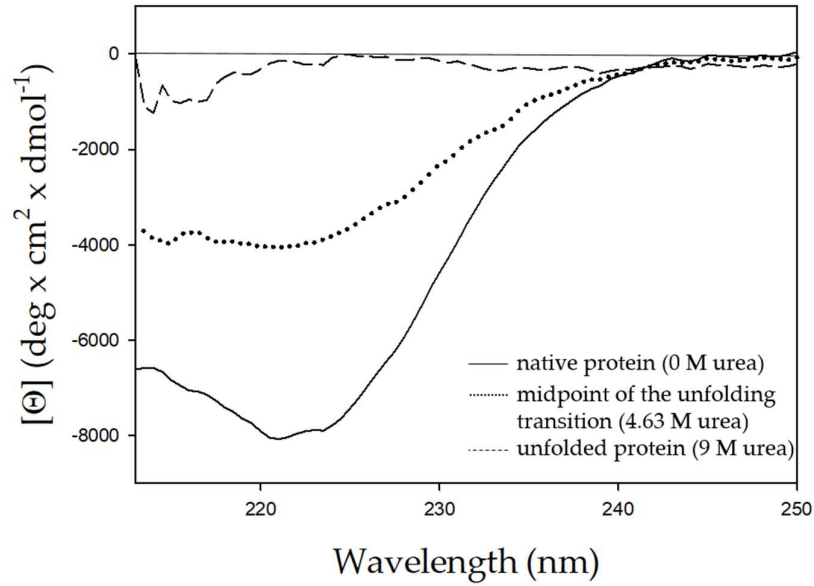

**Figure S1.** Urea-induced equilibrium unfolding of BRD2(2) wild type and mutants. (a) Plot of the molar ellipticity at 222 nm as a function of denaturant concentration of BRD2(2) wild type and mutants. The continuous lines represent the nonlinear global fitting of the molar ellipticities at 222 nm data ( $[\Theta]_{222}$ ) calculated as described in Materials and Methods. Data were normalized between 0 and 100%, where 0 corresponds to the molar ellipticity at 222 nm of the native protein, the smallest value, (at 0 M urea), and 100 corresponds to the molar ellipticity at 222 nm of the unfolded protein, the largest value, (at 9 M urea). Normalization was calculated using GraphPad Prism 5 as follows:  $z_i = (x_i - \min(x)) / (\max(x) - \min(x)) * 100$ , where  $z_i$  is the  $i_{th}$  normalized value in the dataset,  $x_i$  is the  $i_{th}$  value in the dataset,  $\min(x)$  is the smallest value in the dataset and  $\max(x)$  is the largest value in the dataset. (b) Far-UV CD spectra of BRD2(2) wild type. The continuous line represents the far-UV CD spectrum of native protein (0 M urea), the dotted line represents the far-UV CD spectrum at the midpoint of the unfolding transition (4.63 M urea) and the medium dashed line represents the far-UV CD spectrum of the unfolded protein (9 M urea). Spectra were recorded between 213 and 250 nm.

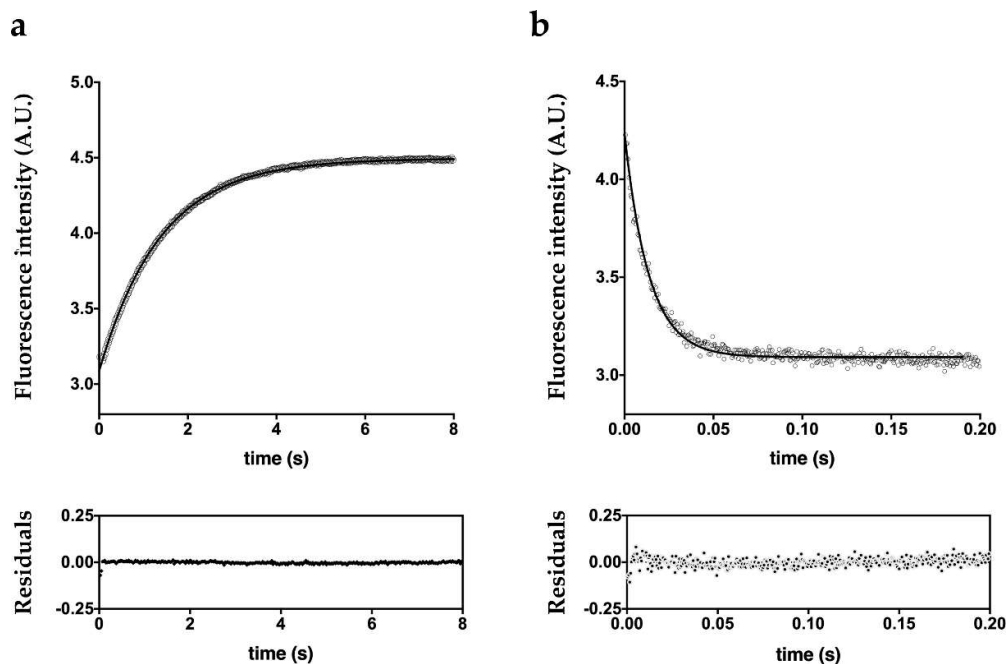

**Figure S2.** Representative kinetic traces of BRD2(2) A367G mutant for unfolding (a) ([Urea]=8.1 M) and refolding (b) ([Urea]=0.7 M) together with their relative residuals plot. The line represents the best fit to a single exponential decay model ( $Y = a \cdot e^{(-k \cdot t)} + c$ ) without any restrain applied: the parameter obtained for unfolding are  $k = 0.72 \pm 0.001 \text{ s}^{-1}$  and  $a = 1.41 \pm 0.001$ , while for refolding are  $k = 72.5 \pm 1.7 \text{ s}^{-1}$  and  $a = 1.1 \pm 0.01$ . The goodness of fit (R square) is 0.9998 and 0.9979 for unfolding and refolding traces respectively.
